# Supplementary material for: Therapeutic opportunities of surface-active ionic liquids: a case study on acetylcholinesterase, citrate synthase and HeLa cell lines
Source: Royal Society of Chemistry journal article supplement (doi:10.1039/d2nj04365c), 2022-01-01
Supplement: d2nj04365c1.pdf [file d2nj04365c1.pdf]

## SUPPLEMENTARY MATERIAL

### **Therapeutic Opportunities of Surface-Active Ionic Liquids: A Case Study on Acetylcholinesterase, Citrate Synthase and HeLa Cell Lines**

**Prayasee Baruah,<sup>a</sup> Dhiman Ray,<sup>a</sup> Ibemhanbi Konthoujam,<sup>b</sup> Abhinandan Das,<sup>c</sup> Suman Chakrabarty,<sup>c</sup> Kripamoy Aguan<sup>b</sup> and Sivaprasad Mitra<sup>a,\*</sup>**

*<sup>a</sup>Centre for Advanced Studies, Department of Chemistry, North-Eastern Hill University, Shillong 793 022, India;*

*<sup>b</sup>Department of Biotechnology & Bioinformatics, North-Eastern Hill University, Shillong 793 022, India;*

*<sup>c</sup>Department of Chemical, Biological & Macromolecular Sciences, S. N. Bose National Centre for Basic Sciences, Kolkata 700106, India.*

## CONTENT

| <b>Item</b> | <b>Description</b>                                                             | <b>Page no.</b> |
|-------------|--------------------------------------------------------------------------------|-----------------|
| Fig. S1     | HRMS spectra of N-dodecylpyridinium bromide (DPB)                              | S3              |
| Fig. S2     | <sup>1</sup> H NMR spectra of N-dodecylpyridinium bromide (DPB)                | S4              |
| Fig. S3     | <sup>13</sup> C NMR spectra of N-dodecylpyridinium bromide (DPB)               | S5              |
| Fig. S4     | FTIR spectra of N-dodecylpyridinium bromide (DPB)                              | S6              |
| Fig. S5     | HRMS spectra of N-tetradecylpyridinium bromide (TPB)                           | S7              |
| Fig. S6     | <sup>1</sup> H NMR spectra of N-tetradecylpyridinium bromide (TPB)             | S8              |
| Fig. S7     | <sup>13</sup> C NMR of N-tetradecylpyridinium bromide (TPB)                    | S9              |
| Fig. S8     | FTIR spectra of N-tetradecylpyridinium bromide (TPB)                           | S10             |
| Fig. S9     | HRMS spectra of N-dodecyl-N-methylmorpholinium Bromide (DMB)                   | S11             |
| Fig. S10    | <sup>1</sup> H NMR spectra of N-dodecyl-N-methylmorpholinium Bromide (DMB)     | S12             |
| Fig. S11    | <sup>13</sup> C NMR spectra of N-dodecyl-N-methylmorpholinium Bromide (DMB)    | S13             |
| Fig. S12    | FTIR spectra of N-dodecyl-N-methylmorpholinium Bromide (DMB)                   | S14             |
| Fig. S13    | HRMS spectra of N-tetradecyl-N-methylmorpholinium Bromide (TMB)                | S15             |
| Fig. S14    | <sup>1</sup> H NMR spectra of N-tetradecyl-N-methylmorpholinium Bromide (TMB)  | S16             |
| Fig. S15    | <sup>13</sup> C NMR spectra of N-tetradecyl-N-methylmorpholinium Bromide (TMB) | S17             |
| Fig. S16    | FTIR spectra of N-tetradecyl-N-methylmorpholinium Bromide (TMB)                | S18             |
| Fig. S17    | HRMS spectra of 1-dodecyl-3-methylimidazolium Bromide (DIB)                    | S19             |
| Fig. S18    | <sup>1</sup> H NMR spectra of 1-dodecyl-3-methylimidazolium Bromide (DIB)      | S20             |
| Fig. S19    | <sup>13</sup> C NMR spectra of 1-dodecyl-3-methylimidazolium Bromide (DIB)     | S21             |
| Fig. S20    | FTIR spectra of 1-dodecyl-3-methylimidazolium Bromide (DIB)                    | S22             |
| Fig. S21    | HRMS spectra of 1-tetradecyl-3-methylimidazolium Bromide (TIB)                 | S23             |
| Fig. S22    | <sup>1</sup> H NMR spectra of 1-dodecyl-3-methylimidazolium Bromide (TIB)      | S24             |
| Fig. S23    | <sup>13</sup> C NMR spectra of 1-dodecyl-3-methylimidazolium Bromide (TIB)     | S25             |
| Fig. S24    | FTIR spectra of 1-dodecyl-3-methylimidazolium Bromide (TIB)                    | S26             |

**Fig. S1.** HRMS spectra of N-dodecylpyridinium bromide (DPB).

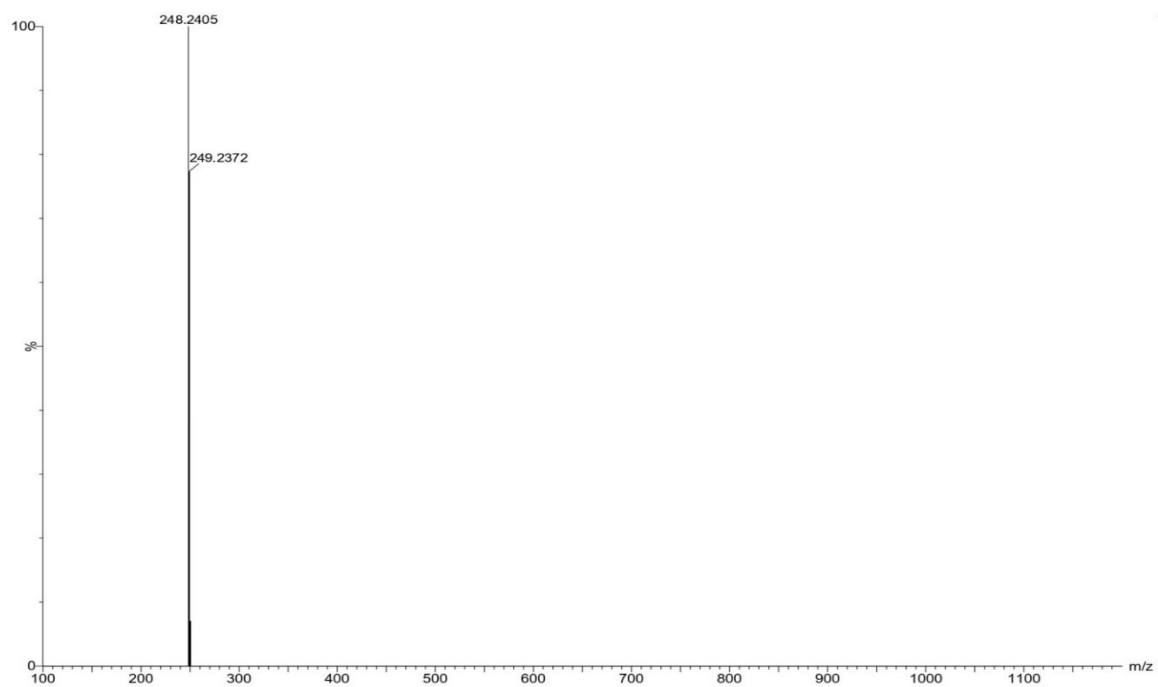

**HRMS:** Calculated for  $[M]^+$  (m/z):  $C_{17}H_{30}N^+$  248; Found: 248.

**Fig. S2.**  $^1\text{H}$  NMR spectra of N-dodecylpyridinium bromide (DPB).

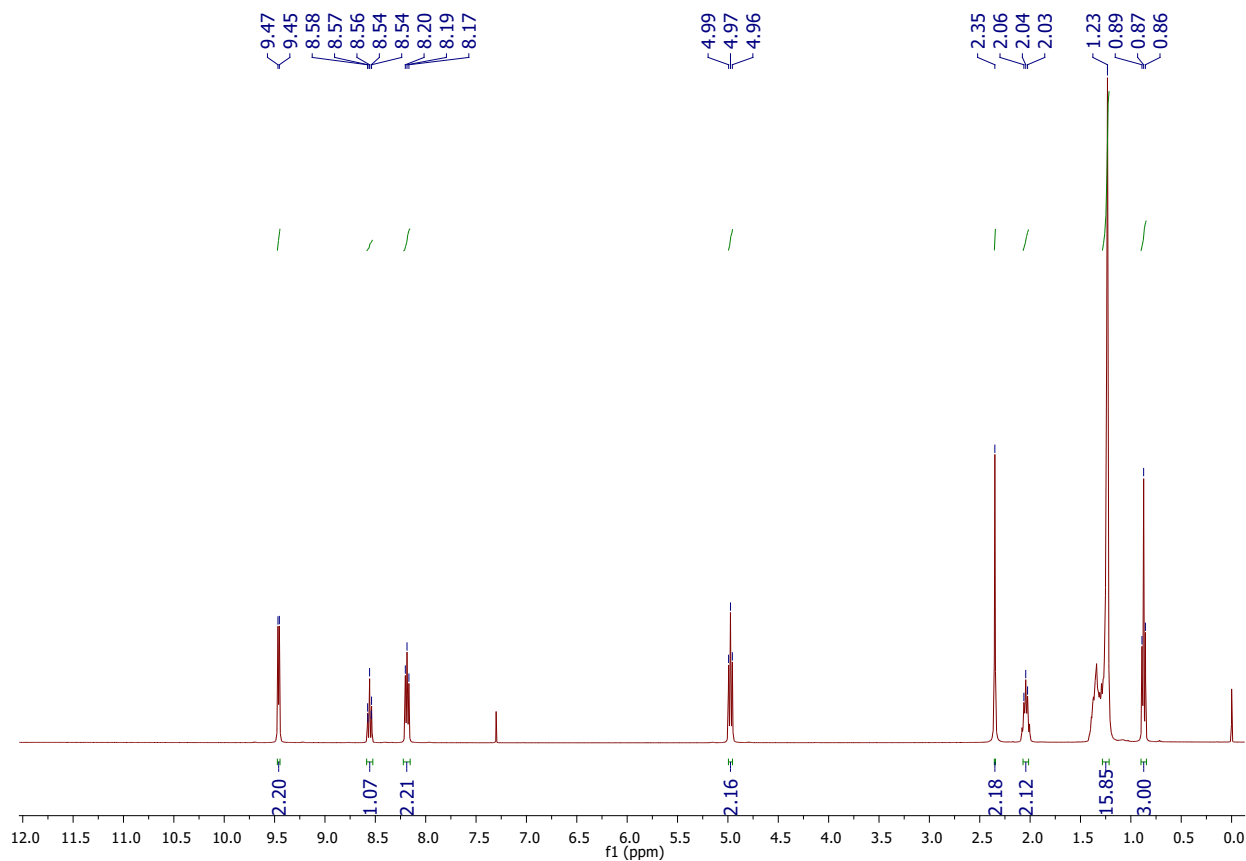

$^1\text{H}$  NMR (400 MHz:  $\text{CDCl}_3$ ,  $\delta/\text{ppm}$  relative to TMS): 0.88 (t,  $j = 6$  Hz, 3H, dodecyl- $\text{CH}_3$ ), 1.23 (brs, 16H, dodecyl  $\text{C}_4$ ,  $\text{C}_5$ ,  $\text{C}_6$ ,  $\text{C}_7$ ,  $\text{C}_8$ ,  $\text{C}_9$ ,  $\text{C}_{10}$ ,  $\text{C}_{11}$ -H), 2.06 (t,  $j=6\text{Hz}$ , 2H, dodecyl  $\text{C}_3$ -H), 2.35 (brs, 2H,  $\text{C}_2$ -H), 4.99 (t,  $j=6\text{Hz}$ , 2H, dodecyl  $\text{C}_1$ -H), 8.20 (t,  $j=6\text{Hz}$ , 2H,  $\text{NCH}(\text{CH}_2)$ ), 8.58 (m, 1H,  $\text{NCHCHCH}$ ), 9.47 (d,  $j=4\text{Hz}$ , 2H,  $\text{N}(\text{CH}_2)$ ) ppm.

**Fig. S3.**  $^{13}\text{C}$  NMR of N-dodecylpyridinium bromide (DPB).

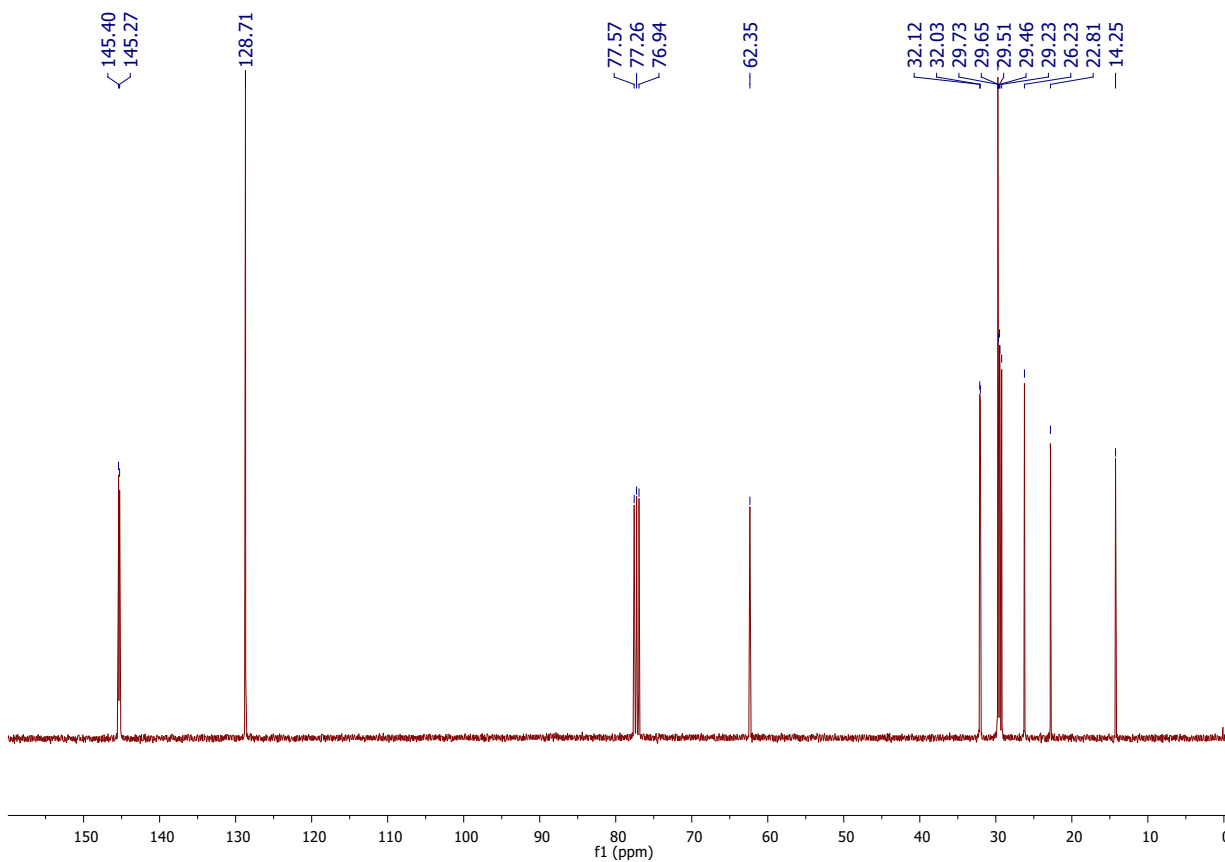

$^{13}\text{C}$  NMR (400 MHz:  $\text{CDCl}_3$ ,  $\delta/\text{ppm}$  relative to TMS): 14.25, 22.81, 26.23, 29.23, 29.46, 29.51, 29.65, 29.73, 32.03, 32.12, 62.35, 128.71, 145.27, 145.40.

**Fig. S4.** FTIR spectra for N-dodecylpyridinium bromide (DPB).

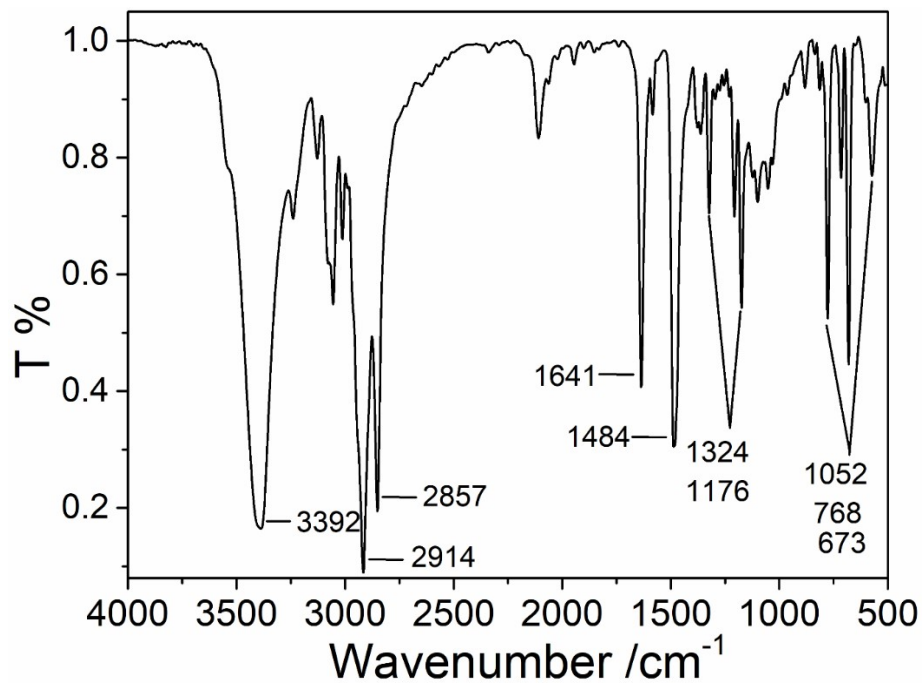

**FTIR:  $\nu_{\max}$  (neat):** 3392  $\text{cm}^{-1}$  (aromatic C-H stretching), 2914 & 2857  $\text{cm}^{-1}$  (aliphatic C-H stretching), 1641  $\text{cm}^{-1}$  (C=N stretching), 1484  $\text{cm}^{-1}$  ( $\text{CH}_2$  bending), 1324  $\text{cm}^{-1}$  ( $\text{CH}_2$  bending), 1176  $\text{cm}^{-1}$  (C-N stretching), 1052, 768, and 673  $\text{cm}^{-1}$  (symmetrical deformations of  $-\text{CH}_3$  groups).

**Fig. S5.** HRMS spectra of N-tetradecylpyridinium bromide (TPB).

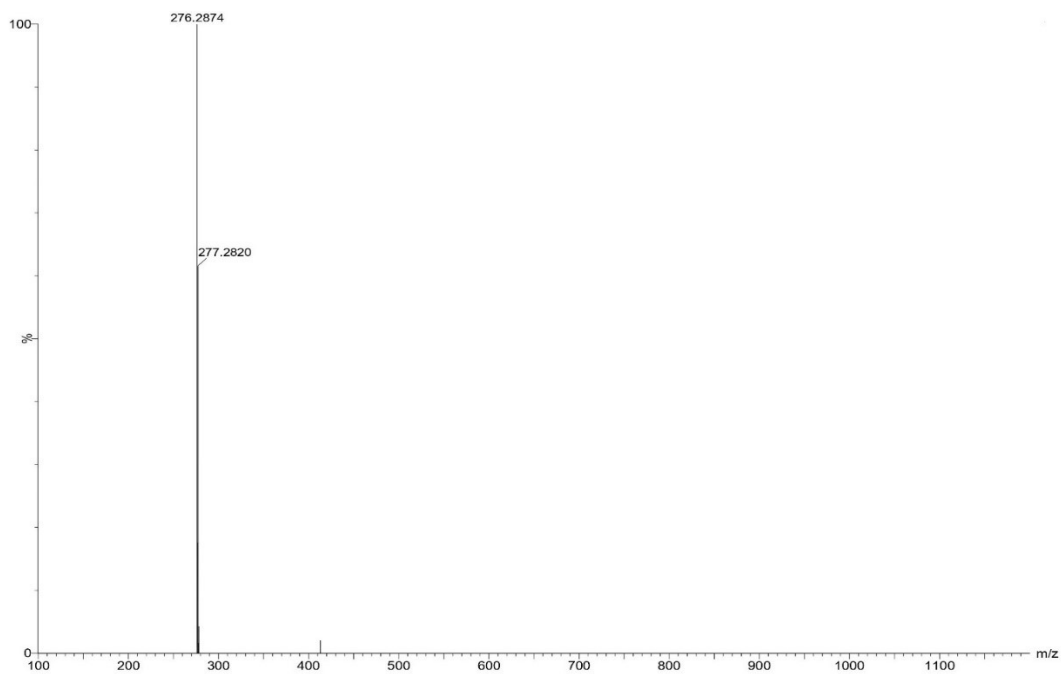

**HRMS:** Calculated for  $[M]^+$  (m/z):  $C_{19}H_{34}N^+$  276; Found: 276.

**Fig. S6.**  $^1\text{H}$  NMR spectra of N-tetradecylpyridinium bromide (TPB).

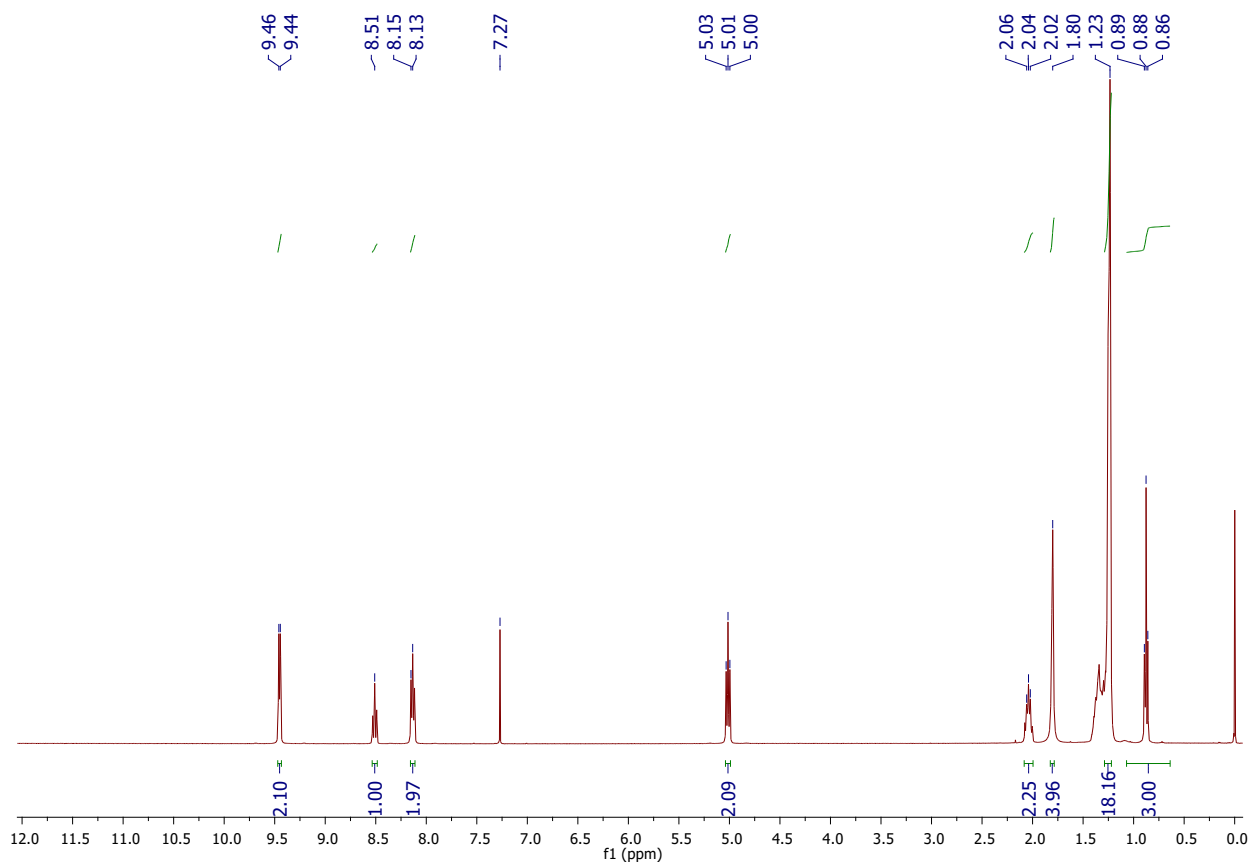

**$^1\text{H}$  NMR (400 MHz:  $\text{CDCl}_3$ ,  $\delta/\text{ppm}$  relative to TMS):** 0.89 (t,  $j=6$  Hz, 3H, dodecyl- $\text{CH}_3$ ), 1.23 (br s, 18H, dodecyl  $\text{C}_5$ ,  $\text{C}_6$ ,  $\text{C}_7$ ,  $\text{C}_8$ ,  $\text{C}_9$ ,  $\text{C}_{10}$ ,  $\text{C}_{11}$ ,  $\text{C}_{12}$ ,  $\text{C}_{13}$ -H), 1.80 (br s, 4H, dodecyl  $\text{C}_3$ ,  $\text{C}_4$ -H), 2.06 (t,  $j=8$  Hz, 2H, dodecyl  $\text{C}_2$ -H), 5.03 (t,  $j=6$  Hz, 2H, dodecyl  $\text{C}_1$ -H), 8.15 (d,  $j=4$  Hz, 2H,  $\text{NCH}(\text{CH})_2$ ), 8.51 (s, 1H,  $\text{NCHCHCH}$ ), 9.46 (d,  $j=4$  Hz, 2H,  $\text{N}(\text{CH})_2$ ) ppm.



**Fig. S7.**  $^{13}\text{C}$  NMR spectra of N-tetradecylpyridinium bromide (TPB).

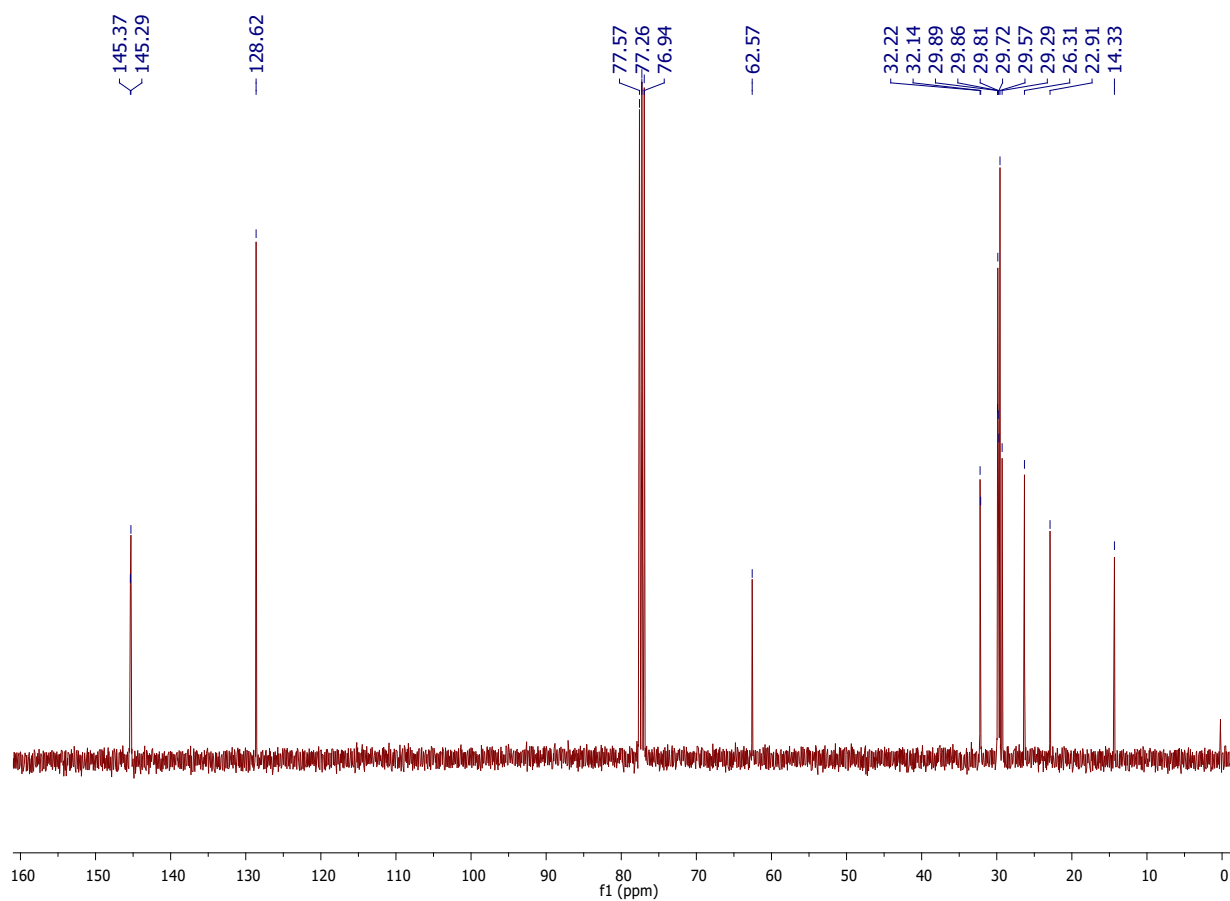

**$^{13}\text{C}$  NMR (400 MHz:  $\text{CDCl}_3$ ,  $\delta/\text{ppm}$  relative to TMS):** 14.33, 22.91, 26.31, 29.29, 29.57, 29.72, 29.81, 29.86, 29.89, 32.14, 32.22, 62.57, 128.62, 145.29, 145.37.

**Fig. S8.** FTIR spectra of N-tetradecylpyridinium bromide (TPB).

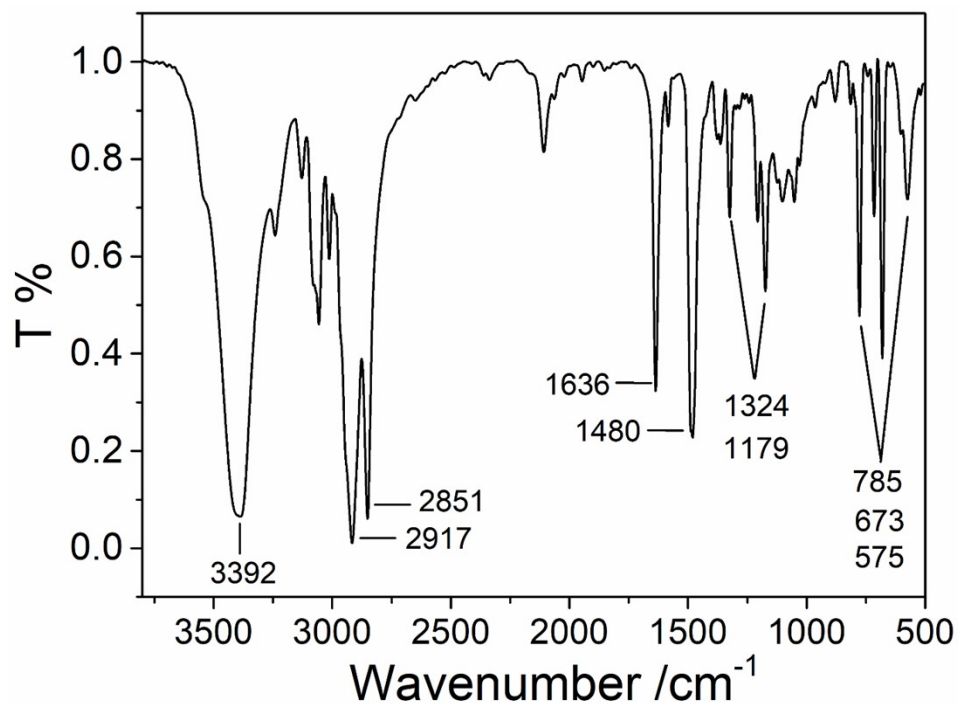

**FTIR:  $\nu_{\max}$  (neat):** 3392  $\text{cm}^{-1}$  (aromatic C-H stretching), 2917 & 2851  $\text{cm}^{-1}$  (aliphatic, C-H stretching), 1636  $\text{cm}^{-1}$  (C=N stretching), 1480  $\text{cm}^{-1}$  ( $\text{CH}_2$  bending), 1324  $\text{cm}^{-1}$  ( $\text{CH}_2$  bending), 1179  $\text{cm}^{-1}$  (C-N stretching), 785, 673, and 575  $\text{cm}^{-1}$  (symmetrical deformations of  $-\text{CH}_3$  groups).

**Fig. S9.** HRMS spectra of N-dodecyl-N-methylmorpholinium Bromide (DMB).

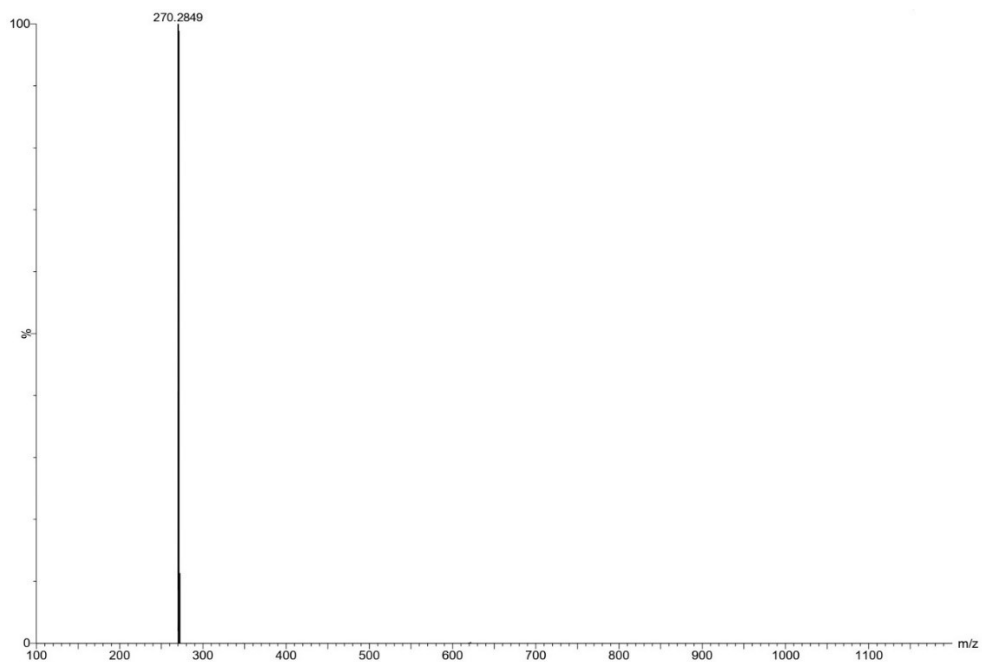

**HRMS:** Calculated for [M]<sup>+</sup> (m/z): C<sub>17</sub>H<sub>36</sub>ON<sup>+</sup> 270; Found: 270.

**Fig. S10.**  $^1\text{H}$  NMR spectra of N-dodecyl-N-methylmorpholinium Bromide (DMB).

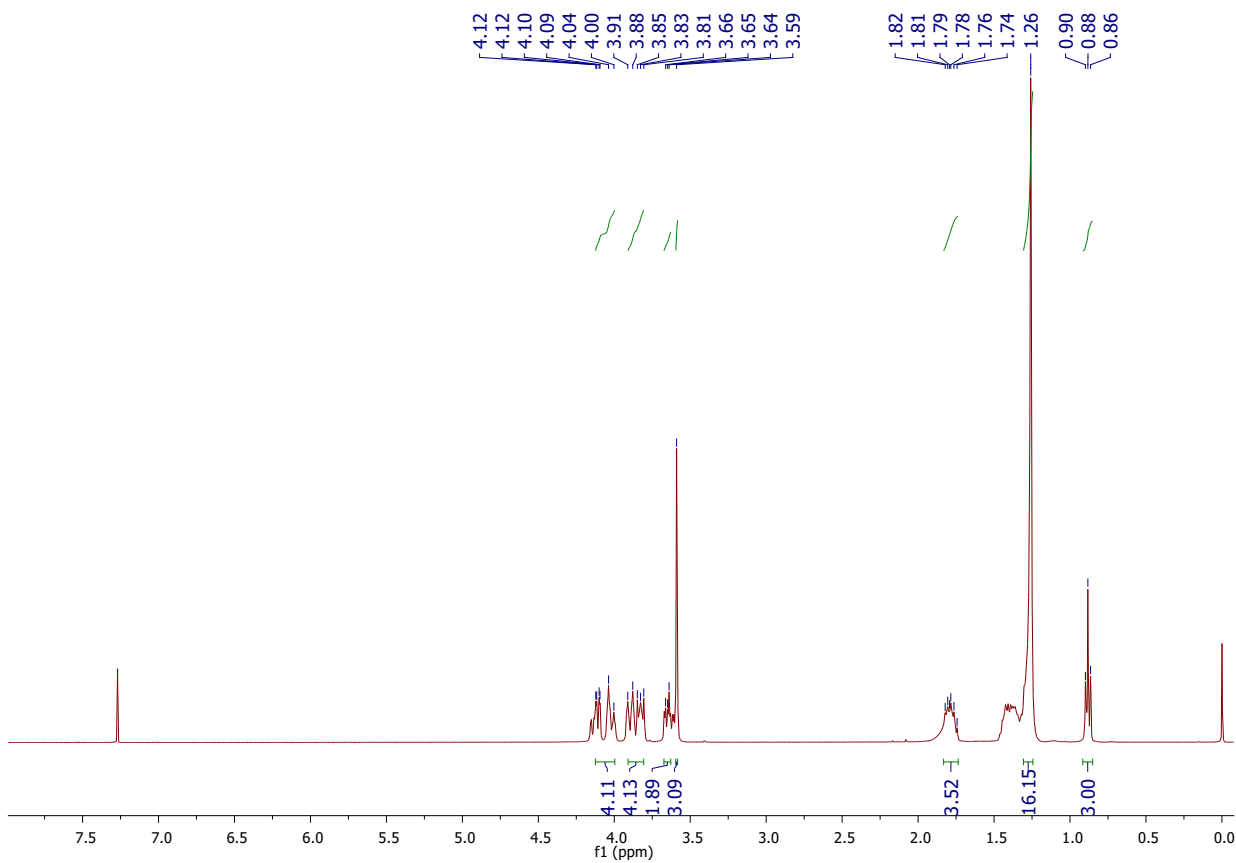

$^1\text{H}$ -NMR (400 MHz:  $\text{CDCl}_3$ ,  $\delta/\text{ppm}$  relative to TMS): 0.90 (t, 3H, dodecyl- $\text{CH}_3$ ), 1.26 (br s, 16H, dodecyl  $\text{C}_7$ ,  $\text{C}_8$ ,  $\text{C}_9$ ,  $\text{C}_{10}$ ,  $\text{C}_{11}$ ,  $\text{C}_{12}$ ,  $\text{C}_{13}$ -H), 1.82 (m, 4H, dodecyl  $\text{C}_5, \text{C}_6$ ), 3.59 (br s, 3H,  $\text{NCH}_3$ ), 3.66 (t,  $j=2\text{H}$ ,  $\text{NCH}_2$ ), 3.91 (m, 4H,  $\text{N}(\text{CH}_2)_2$ ), 4.12 (m, 4H,  $\text{O}(\text{CH}_2)_2$ ).

**Fig. S11.**  $^{13}\text{C}$  NMR of N-dodecyl-N-methylmorpholinium Bromide (DMB).

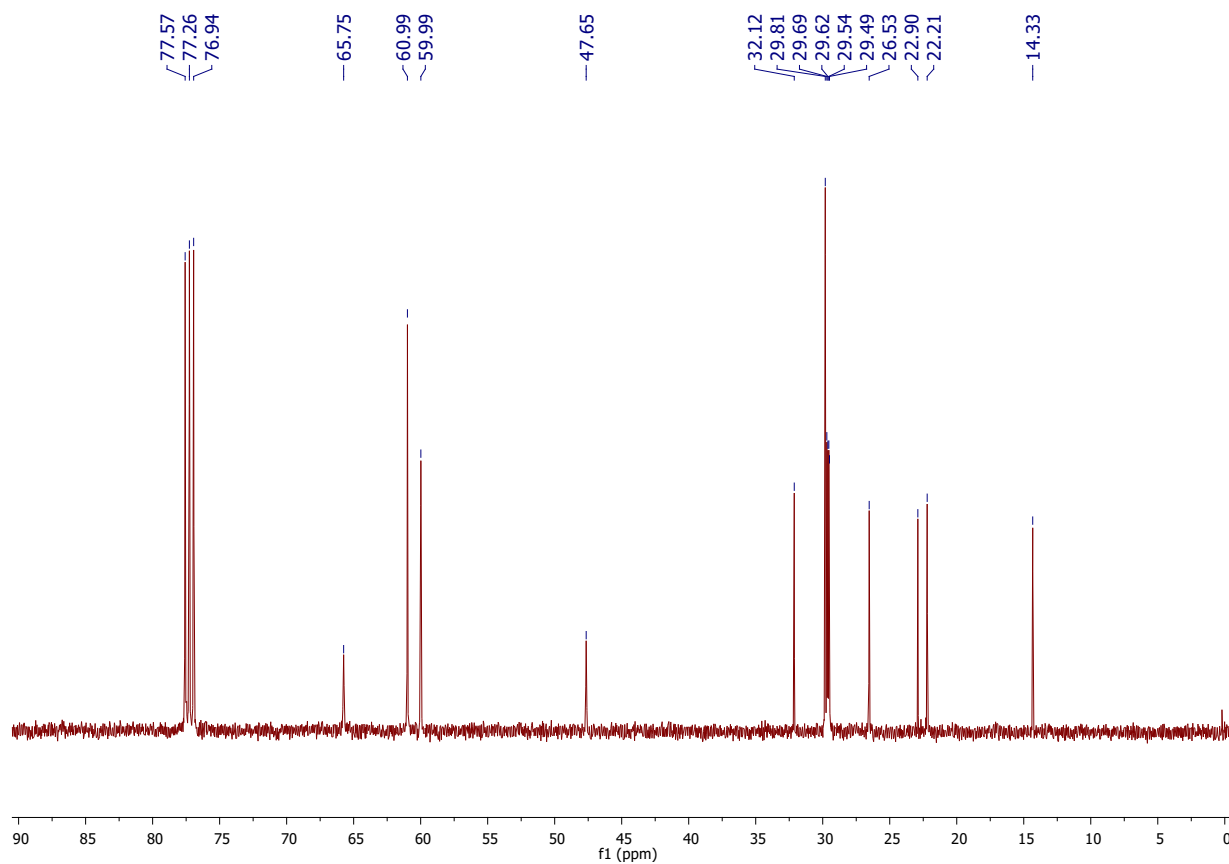

$^{13}\text{C}$  NMR (400 MHz:  $\text{CDCl}_3$ ,  $\delta/\text{ppm}$  relative to TMS): 14.33, 22.21, 22.90, 26.53, 29.49, 29.54, 29.62, 29.69, 29.81, 32.12, 47.65, 59.99, 60.99, 65.75.

**Fig. S12.** FTIR spectra of N-dodecyl-N-methylmorpholinium Bromide (DMB).

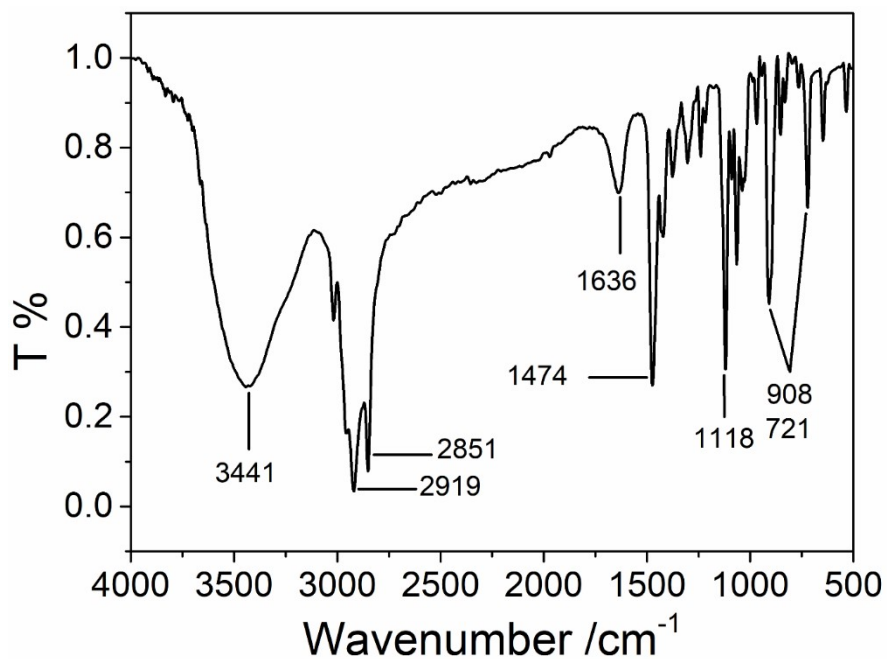

**FTIR:  $\nu_{\max}$  (neat):** 3441 cm<sup>-1</sup> (O-H stretching), 2919 and 2851 cm<sup>-1</sup> (aliphatic, C-H stretching), 1636 cm<sup>-1</sup> (C=N stretching), 1474 cm<sup>-1</sup> (CH<sub>2</sub> bending), 1118 cm<sup>-1</sup> (C-N stretching), 908, and 721 cm<sup>-1</sup> (symmetrical deformations of -CH<sub>3</sub> groups).

**Fig. S13.** HRMS spectra of N-tetradecyl-N-methylmorpholinium Bromide (TMB).

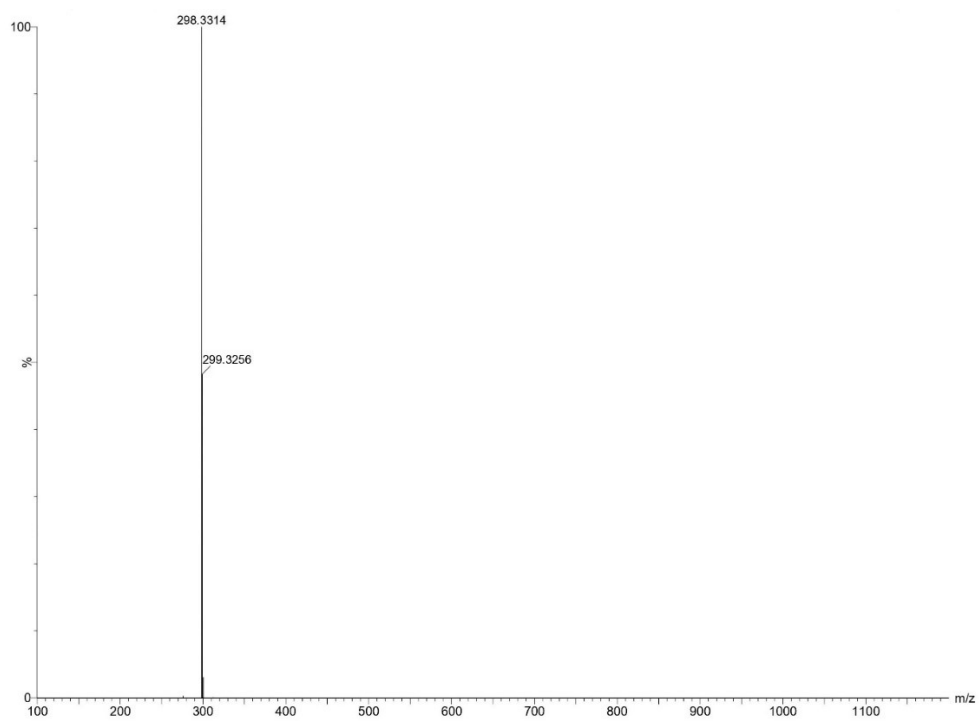

**HRMS:** Calculated for  $[M]^+$  (m/z):  $C_{19}H_{40}ON^+$  298; Found: 298.

**Fig. S14.**  $^1\text{H}$  NMR spectra of N-tetradecyl-N-methylmorpholinium Bromide (TMB).

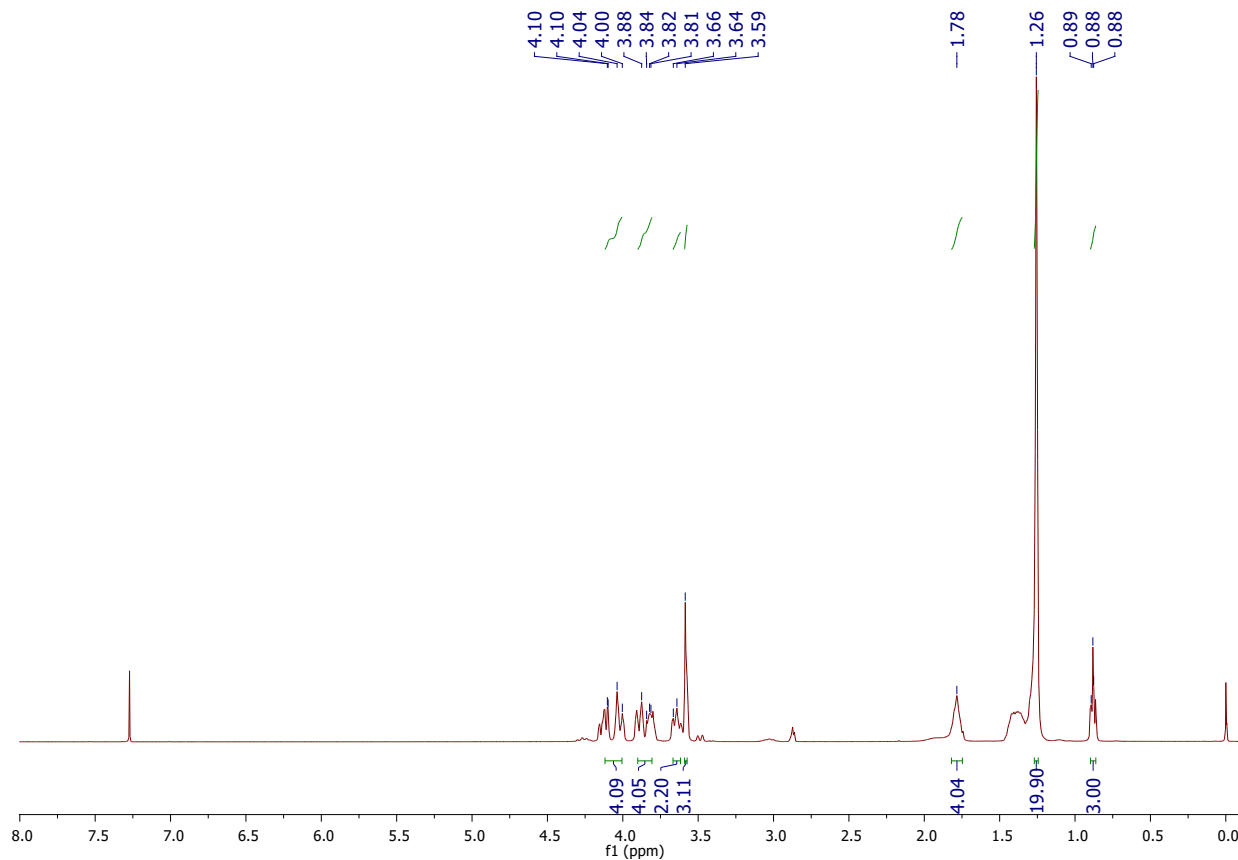

$^1\text{H}$ -NMR (400 MHz:  $\text{CDCl}_3$ ,  $\delta$ /ppm relative to TMS): 0.90 (t,  $j=8$  Hz, 3H, dodecyl- $\text{CH}_3$ ), 1.26 (br s, 20H, dodecyl  $\text{C}_4$ ,  $\text{C}_5$ ,  $\text{C}_6$ ,  $\text{C}_7$ ,  $\text{C}_8$ ,  $\text{C}_9$ ,  $\text{C}_{10}$ ,  $\text{C}_{11}$ ,  $\text{C}_{12}$ ,  $\text{C}_{13}$ -H), 1.78 (t,  $j=4$ Hz, 2H, dodecyl  $\text{C}_2$ ), 2.37 (brs, 2H, dodecyl  $\text{C}_3$ ), 3.59 (s, 3H,  $\text{NCH}_3$ ), 3.66 (d,  $j=8$ Hz, 2H, dodecyl  $\text{C}_1$ ), 3.88 (m, 2H,  $\text{N}(\text{CH}_2)_2$ ), 4.10 (m, 4H,  $\text{O}(\text{CH}_2)_2$ ).



**Fig. S15.**  $^{13}\text{C}$  NMR spectra of N-tetradecyl-N-methylmorpholinium Bromide (TMB).

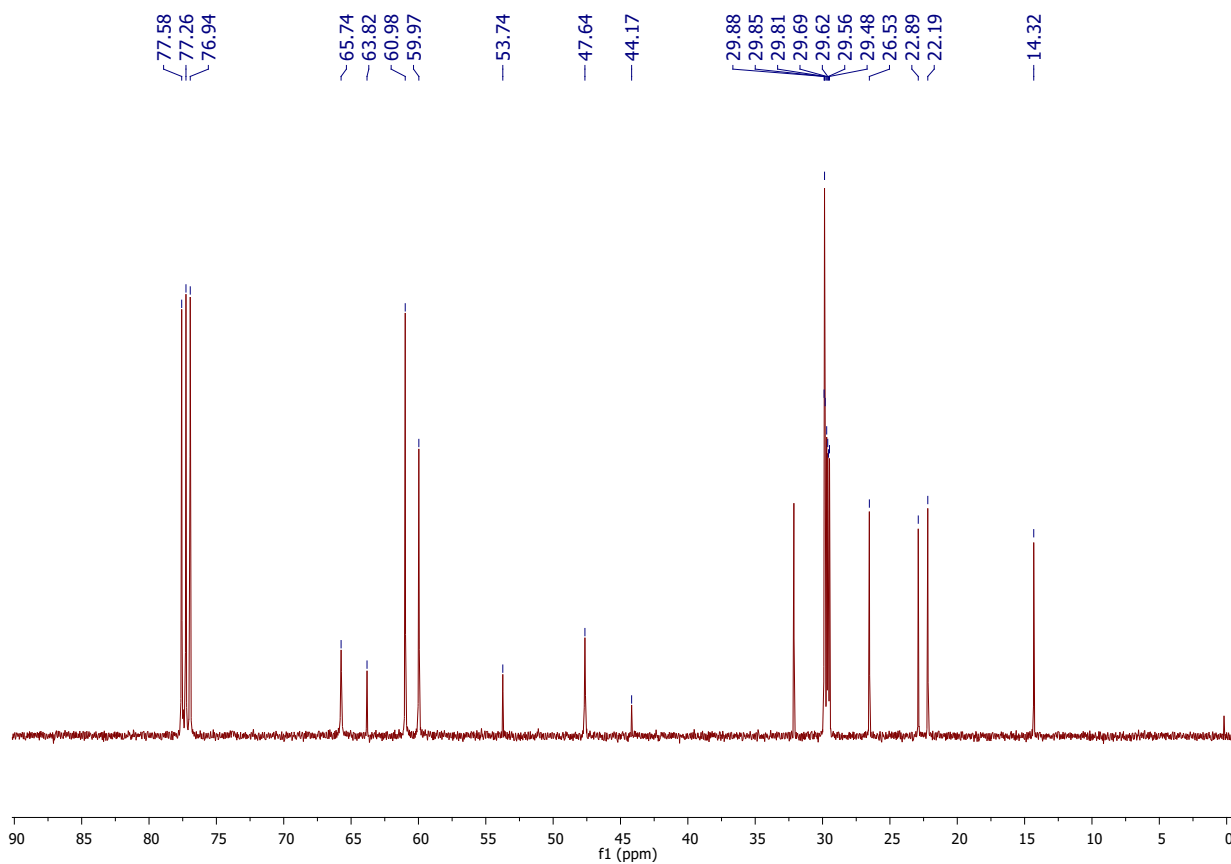

$^{13}\text{C}$ -NMR (400 MHz:  $\text{CDCl}_3$ ,  $\delta/\text{ppm}$  relative to TMS): 14.32, 22.19, 22.89, 26.53, 29.48, 29.56, 29.62, 29.69, 29.81, 29.85, 29.88, 32.13, 44.17, 47.64, 53.74, 59.97, 60.98, 63.82.

**Fig. S16.** FTIR spectra of N-tetradecyl-N-methylmorpholinium Bromide (TMB).

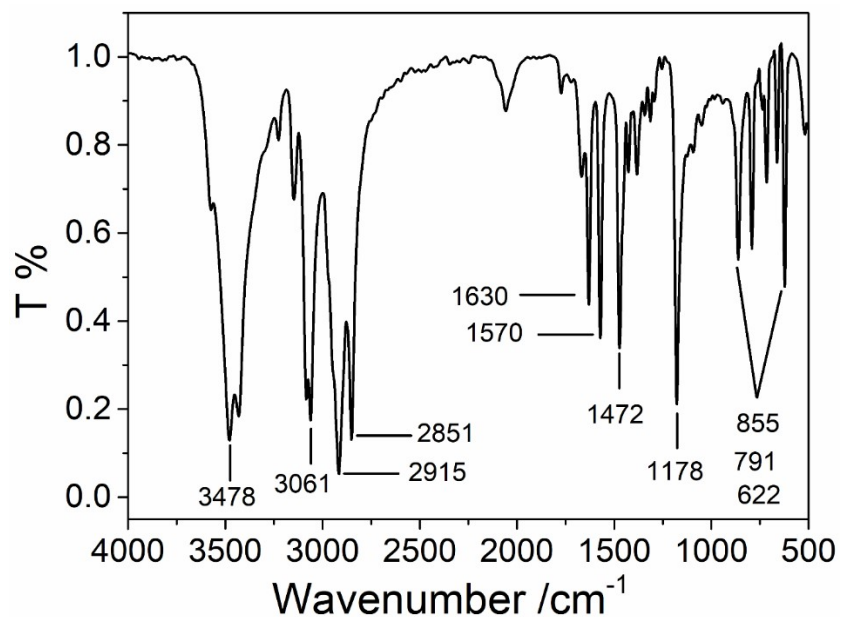

**FTIR:  $\nu_{\max}$  (neat):** 3478 (O-H stretching), 3061 (N-H axial deformation), 2915 and 2851 cm<sup>-1</sup> (aliphatic, C-H stretching), 1630 and 1570 cm<sup>-1</sup> (C=N stretching), 1472 cm<sup>-1</sup> (CH<sub>2</sub> bending), 1178 cm<sup>-1</sup> (C-N stretching), 855, 791, and 622 cm<sup>-1</sup> (symmetrical deformations of -CH<sub>3</sub> groups).

**Fig. S17.** HRMS spectra of 1-dodecyl-3-methylimidazolium Bromide (DIB).

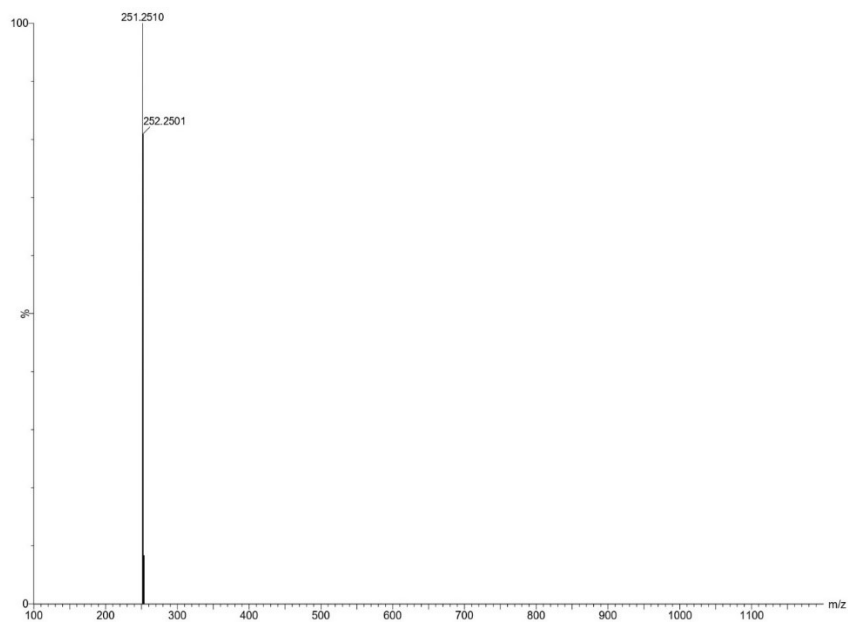

**HRMS:** Calculated for  $[M]^+$  (m/z):  $C_{16}H_{31}N_2^+$  251; Found: 251.

**Fig. S18.**  $^1\text{H}$  NMR spectra of 1-dodecyl-3-methylimidazolium Bromide (DIB).

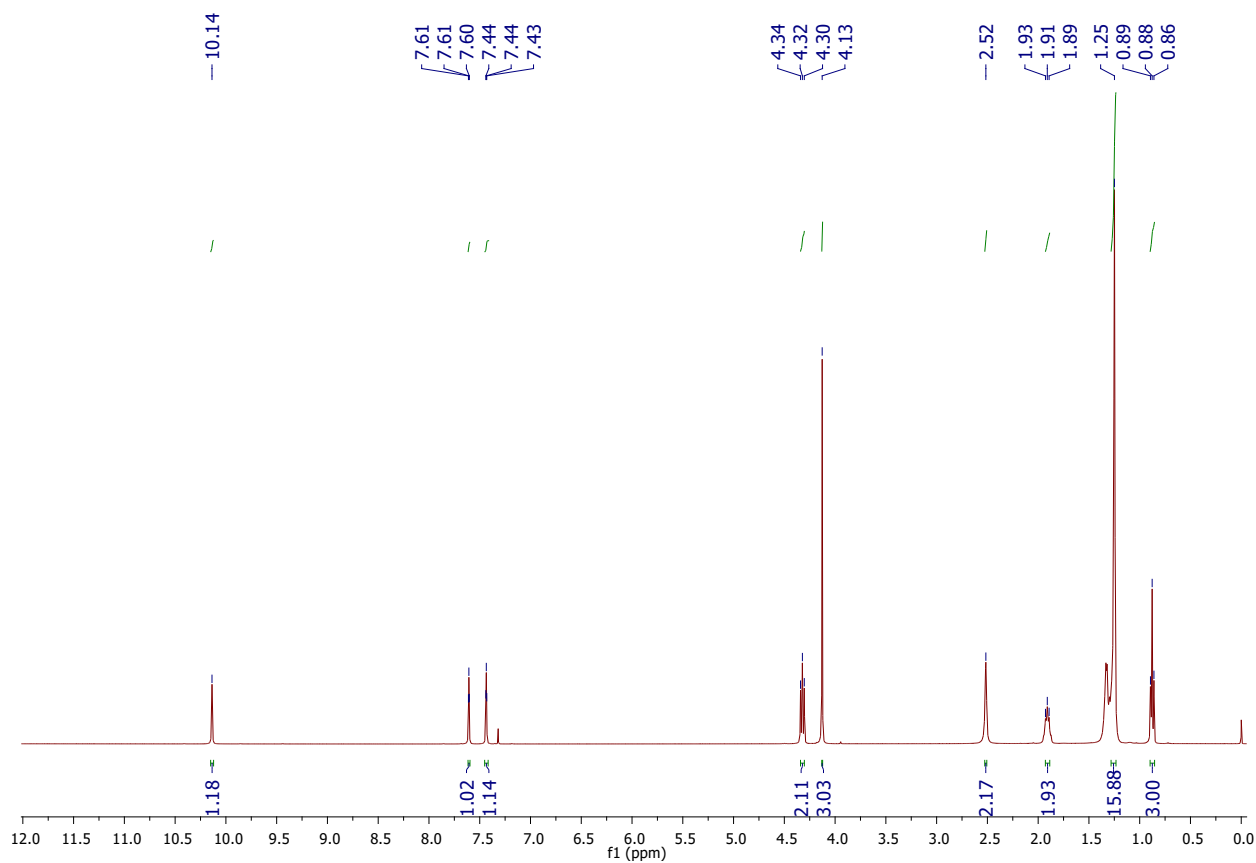

$^1\text{H}$  NMR (400 MHz:  $\text{CDCl}_3$ ,  $\delta$ /ppm relative to TMS): 0.89 (t,  $j=6$  Hz, 3H, dodecyl- $\text{CH}_3$ ), 1.25 (br s, 16H, dodecyl  $\text{C}_4$ ,  $\text{C}_5$ ,  $\text{C}_6$ ,  $\text{C}_7$ ,  $\text{C}_8$ ,  $\text{C}_9$ ,  $\text{C}_{10}$ ,  $\text{C}_{11}$ -H), 1.93 (t,  $j=8$ Hz, 2H, dodecyl  $\text{C}_3$ -H), 2.52 (brs, 2H, dodecyl  $\text{C}_2$ -H), 4.13 (s, 3H,  $\text{NCH}_3$ ), 4.34 (t,  $j=8$ Hz, 2H, dodecyl  $\text{C}_1$ -H), 7.44 (t,  $j=2$ Hz, 1H,  $\text{C}_4$ -H), 7.61 (t,  $j=2$ Hz, 1H,  $\text{C}_5$ -H), 10.14 (s, 1H,  $\text{C}_2$ -H).

**Fig. S19.**  $^{13}\text{C}$  NMR spectra of 1-dodecyl-3-methylimidazolium Bromide (DIB).

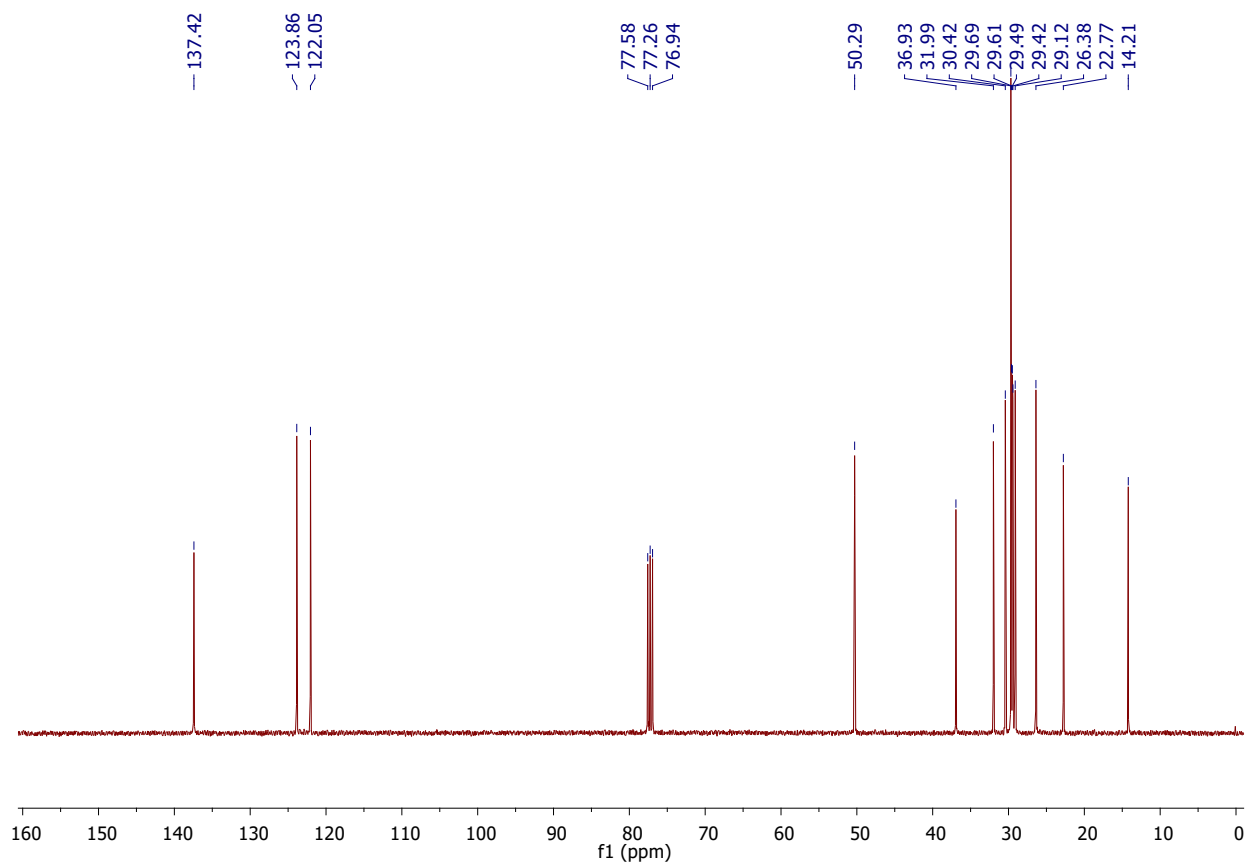

$^{13}\text{C}$  NMR (400 MHz:  $\text{CDCl}_3$ ,  $\delta/\text{ppm}$  relative to TMS): 14.21, 22.77, 26.38, 29.12, 29.42, 29.49, 29.61, 29.69, 30.42, 31.99, 36.93, 50.29, 122.05, 123.86, 137.42.

**Fig. S20.** FTIR spectra of 1-dodecyl-3-methylimidazolium Bromide (DIB).

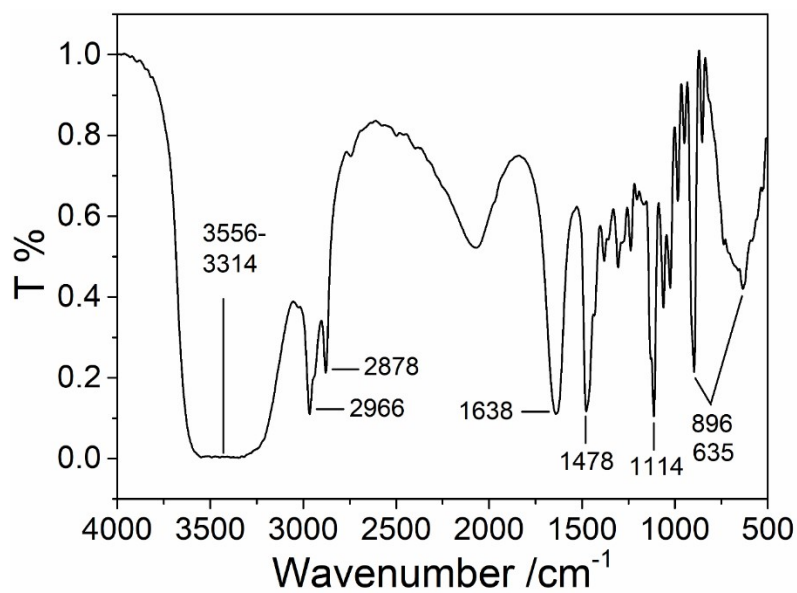

**FTIR:  $\nu_{\max}$  (neat):** 3556-3314 cm<sup>-1</sup> (aromatic C–H stretching), 2966, 2878 (aliphatic C–H stretching), 1638 cm<sup>-1</sup> (C=N stretching), 1478 (CH<sub>2</sub> bending), 1114 cm<sup>-1</sup> (C–N stretching), 896, and 635 cm<sup>-1</sup> (symmetrical deformations of -CH<sub>3</sub> groups).

**Fig.S21.** HRMS spectra of 1-tetradecyl-3-methylimidazolium Bromide (TIB).

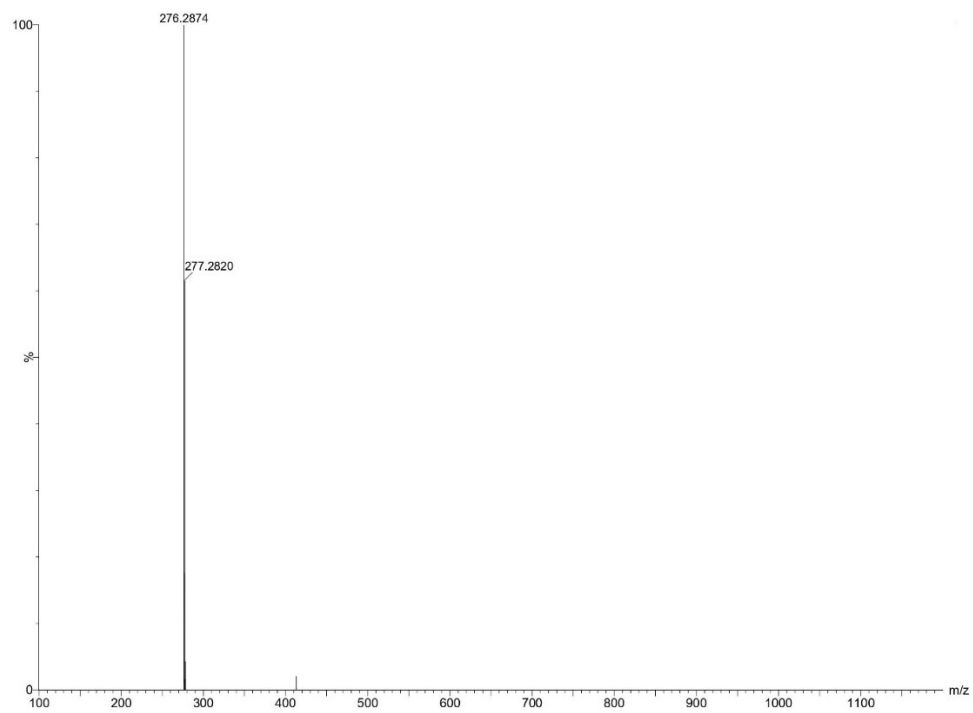

**HRMS:** Calculated for  $[M]^+$  (m/z):  $C_{18}H_{35}N_2^+$  279; Found: 276.

**Fig. S22.**  $^1\text{H}$  NMR spectra of 1-tetradecyl-3-methylimidazolium Bromide (TIB).

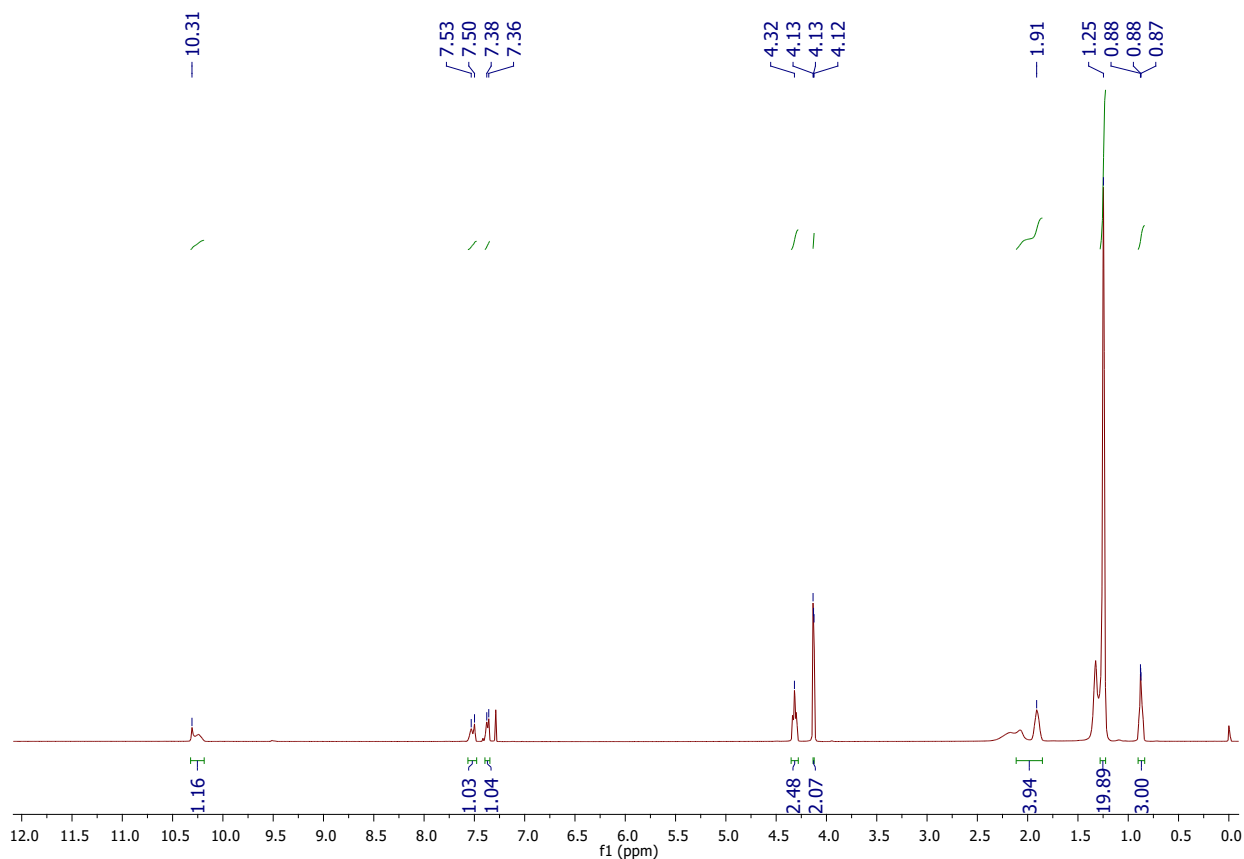

$^1\text{H}$  NMR (400 MHz:  $\text{CDCl}_3$ ,  $\delta/\text{ppm}$  relative to TMS): 0.88 (t,  $j=2\text{ Hz}$ , 3H, dodecyl- $\text{CH}_3$ ), 1.25 (br s, 18H, dodecyl  $\text{C}_4$ ,  $\text{C}_5$ ,  $\text{C}_6$ ,  $\text{C}_7$ ,  $\text{C}_8$ ,  $\text{C}_9$ ,  $\text{C}_{10}$ ,  $\text{C}_{11}$ ,  $\text{C}_{12}$ ,  $\text{C}_{13}$ -H), 1.91 (brs, 4H, dodecyl  $\text{C}_2$ ,  $\text{C}_3$ -H), 4.13 (t,  $j=2\text{ Hz}$ , 2H, dodecyl  $\text{C}_1$ -H), 4.32 (s, 3H,  $\text{NCH}_3$ ), 7.38 (d,  $j=4\text{ Hz}$ , 1H,  $\text{C}_4$ -H), 7.53 (d,  $j=6\text{ Hz}$ , 1H,  $\text{C}_5$ -H), 10.31 (s, 1H,  $\text{C}_2$ -H).



**Fig. S23.** HRMS spectra of 1-tetradecyl-3-methylimidazolium Bromide (TIB).

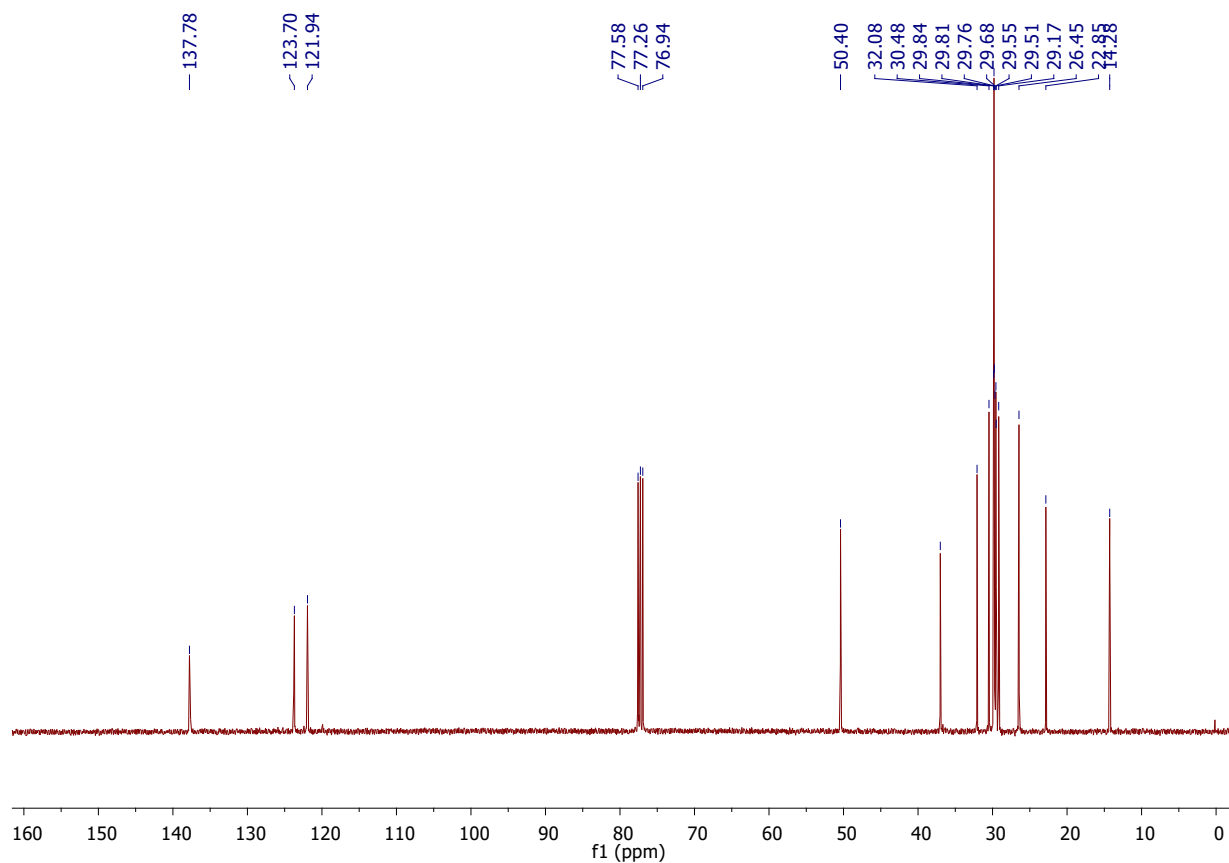

**Fig. S24.** FTIR spectra of 1-tetradecyl-3-methylimidazolium Bromide (TIB).

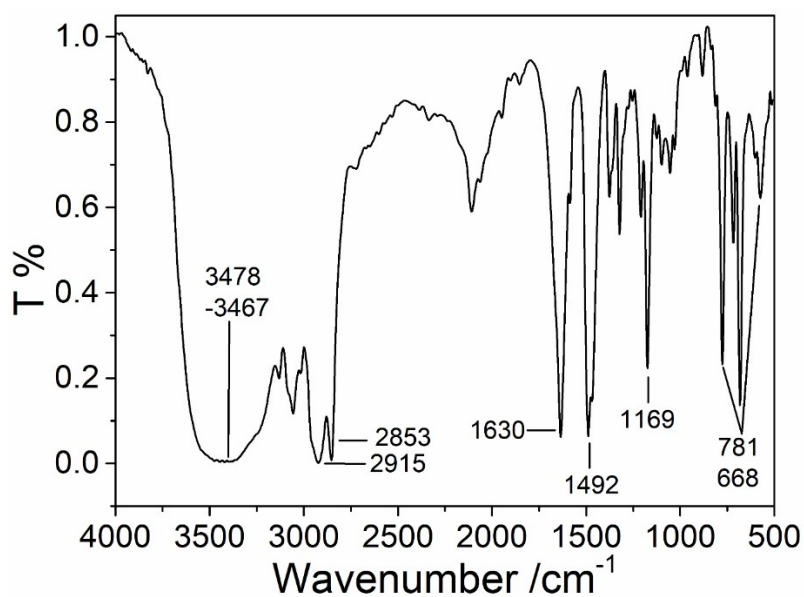

**FTIR:  $\nu_{\max}$  (neat):** 3478-3467  $\text{cm}^{-1}$  (aromatic C–H stretching), 2915, 2853  $\text{cm}^{-1}$  (aliphatic C–H stretching), 1630  $\text{cm}^{-1}$  (C=N stretching), 1492  $\text{cm}^{-1}$  ( $\text{CH}_2$  bending), 1169  $\text{cm}^{-1}$  (C–N stretching), 781, 668  $\text{cm}^{-1}$  (symmetrical deformations of  $-\text{CH}_3$  groups).
